# Supplementary material for: The Irish Potato Famine Pathogen Phytophthora infestans Translocates the CRN8 Kinase into Host Plant Cells
Source: PubMed Central journal article supplement (PMC3426532; doi:10.1371/journal.ppat.1002875), 2012-08-23
Supplement: ppat.1002875.s002.pdf [file ppat.1002875.s002.pdf]

Pi\_19589 1 DLWLSRFQHSEVAKLTLLPTRGDLNEFIGQPLPVKIGLPQSVFQAWSSPLILGQL--LRD  
Pi\_12090 1 DLWLSRFQHSEVAKLTLLPTRGDLNEFIGQPLPVKIGLPQSVFQAWSSPSILGQL--LRD  
Pi\_23274 1 DLWLSRFQHSEVAKLTLLPTRGDLNEFIGQPLPVKIGLPQSVFQAWSSPLILGQL--LRD  
Pi\_12094 1 DLWLSRFQHSEVAKLTLLPTRGDLNEFIGQPLPVKIGLPQSVFQAWSSPLILGQL--LRD  
Pi\_16585 1 DLWLSRFQHSEVAKLTLLPTRGDLNEFIGQPLPVKIGLPQSVFQAWSSPSILGQL--LRD  
Pi\_16618 1 DLWLSRFQHSEVAKLTLLPTRVLDNEFIGQPLPVKIGLPQSVFQAWSSPSILGQL--LRD  
Pi\_19318 1 DLWLSRFQHCEVAKLTLLPTRGDLNEFIGQPLPVKIGLPQSVFQAWSSPLILGQL--LRD  
Pi\_12646 1 DLWLSRFQHCEVAKLTLLPTRGDLNEFIGQPLPVKIGLPQSVFQAWSSPLILGQL--LRD  
Pi\_16636 1 DLWLSRFQHSEVAKLTLLPTRGDLNEFIGQPLPVKIGLPQSVFQAWSSPLILGQL--LRD  
CRN8 1 DLWLSRFQHSEVAKLTLLPTRGDLNEFIGQPLPVKIGLPQSVFQAWSSPLILGQL--LRD  
Pi\_19565 1 DLWLSRFQHSEVAKLTLLPTRGDLNEFIGQPLPVKIGLPQSVFQAWSSPLILGQL--LRD  
Pr\_84114 1 DAWKAIKDEQVTELP--STCEDLREHLQRPLHVKVPVNDRLFLLIVSTKNTTGELSSILD  
Pr\_80840 1 DAWKAIKDEQVTELP--STCEDLREHLQRPLHVKVPVNDRLFLLIVSTKNTTGELSSILD  
Pr\_75879 1 DAWKAIKDEQVTELP--STCEDLKEHLQRPLHVKVPVNDRLFLLIMSTKNTTGELSSILD

Pi\_19589 59 KLFELNDISPCEFLKDSVFSAAFPLYQVDG-DATESAFHYFWDSIIRVVLGVFVFRAYVN  
Pi\_12090 59 KLFELNDISPCEFLKDSVFSAAFPLYQVDG-DATESAFHYFWDSIIRVVLGVFVFRAYVN  
Pi\_23274 59 KLFELNDISPCEFLKDSVFSAAFPLYQVDG-DATESAFHYFWDSIIRVVLGVFVFRAYVN  
Pi\_12094 59 KLFELNDISPCEFLKDSVFSAAFPLYQVDG-DATESAFHYFWDSIIRVVLGVFVFRAYVN  
Pi\_16585 59 KLFELNDISPCEFLKDSVFSAAFPLYQVDG-DATESAFHYFWDSIIRVVLGVFVFRAYIN  
Pi\_16618 59 KLFELNDISPCEFLKDSVFSAAFPLYQVDG-DATESAFHYFWDSIIRVVLGVFVFRAYIN  
Pi\_19318 59 KLFELNDISPCEFLKDSVFSAAFPLYQVDG-DATESAFHYFWDSIIRVVLGVFVFRAYIN  
Pi\_12646 59 KLFELNDISPCFLKDSVFSAAFPLYQVDG-DATESAFHYFWDSIIRVVLGVFVFRAYVN  
Pi\_16636 59 KLFELNDISPCEFLKDSVFSAAFPLYQVDG-DATESAFHYFWDSIIRVVLGVFVFRAYVN  
CRN8 59 KLFELNDISPCEFLKDSVFSAAFPLYQVDG-DATESAFHYFWDSIIRVVLGVFVFRAYVN  
Pi\_19565 59 KLFELNDISPCEFLKDSVFSAAFPLYQVDG-DATESAFHYFWDSIIRVVLGVFVFRAYIN  
Pr\_84114 59 KVFEPDPRETLSDITAGILGSVIDPLGSGSEFATEDTYHHLWDSLIIAMLLRRVSN-GKFR  
Pr\_80840 59 KVFEPDPRETRSDITAGILGSVIDPLGSGSEFATEDTYHHLWDSLIIAMLLRRVSN-GKFR  
Pr\_75879 59 KVFEPDPKRKTLSDITAGILGSVIDPLGSGSEFATEDTYHHLWDSLIIAMLLRRVSN-GKFR

Pi\_19589 118 RDSSRKSSSSGLKRPDFLFALD--HICVFRGEEKEPRTSITVPREELSKKLWVSYGGVPYV  
Pi\_12090 118 RDSSRKSSSSGLKRPDFLFALD--HICVFRGEEKEPRTSITVPREELSKKLWVSYGGVPYV  
Pi\_23274 118 RDSSRKSSSSGLKRPDFLFALD--HICVFRGEEKEPRTSITVPREELSKKLWVSYGGVPYV  
Pi\_12094 118 RDSSRKSLSGLKRPDFLFALD--HICVFRGEEKEPRTSITVPREELSKKLWVSYGGVPYV  
Pi\_16585 118 RDSSRKSSSSGLKRPDFLFALD--HICVFRGEEKEPRTSITVPREELSKTLVWVSYGGVPYV  
Pi\_16618 118 RDSSRKSSSSGLKRPDFLFALD--HICVFRGEEKEPRTSITVPREELSKTLVWVSYGGVPYV  
Pi\_19318 118 RDSSRKSSSSGLKRPDFLFALD--HICVFRGEEKEPRTSINVPREELSKKLWVSYGGVPYV  
Pi\_12646 118 RDSSRKSSSSGLKRPDFLFALD--HICVFRGEEKEPRTSITVPREELSKKLWVSYGGVPYV  
Pi\_16636 118 RDSSRKSSSSGLKRPDFLFALD--HICVFRGEEKEPRTSITVPREELSKKLWVSYGGVPYV  
CRN8 118 RDSSRKSSSSGLKRPDFLFALD--HICVFRGEEKEPRTSITVPREELSKKLWVSYGGVPYV  
Pi\_19565 118 RDSSRKSSSSGLKRPDFLFALD--HICVFRGEEKEPRTSITVPREELSKKLWVSYGGVPYV  
Pr\_84114 118 RNINASTSITGLYRPDLCFYKNSNVCVVRGEEQ-ASGELQVPVRELHEKLTWRDYDAAPYV  
Pr\_80840 118 RNINASTSITGLYRPDLCFYKNSNVCVVRGEEK-ASGELQVPVRELYEKLITWRDYDAAPYV  
Pr\_75879 118 RNINASTSITGLYRPDLCFYKNSNVCVVRGEEK-ASGELQVPVRKLHEKLTWRDYDAAPYV

Pi\_19589 176 FGYAASGFELELFAIYQDVTGN--VKTHLIGGFNLQHAPERFRLVLALLNLCLLFP AIVQ  
Pi\_12090 176 FGYAASGFELELFAIYQDVTGN--VKTHLIGGFNLQHAPERFRLVLALLNLCLLFP AIVQ  
Pi\_23274 176 FGYAASGFELELFAIYQDVTGN--VKTHLIGGFNLQHAPERFRLVLALLNLCLLFP AIVQ  
Pi\_12094 176 FGYAASGFELELFAIYQDVTGN--VKTHLIGGFNLQHAPERFRLVLALLNLCLLFP AIVQ  
Pi\_16585 176 FGYAASGFELELFAIYQDVTGN--VKTHLIGGFNLQHAPERFRLVLALLNLCLLFP AIVQ  
Pi\_16618 176 FGYAASGFELELFAIYQDVTGN--VKTHLIGGFNLQHAPERFRLVLALLNLCLLFP AIVQ  
Pi\_19318 176 FGYAASGFELELFAIYQDVTGN--VKTHLIGGFNLQHAPERFRLVLALLNLCLLFP AIVQ  
Pi\_12646 176 FGYAASGFELELFAIYQDVTGN--VKTHLIGGFNLQHAPERFRLVLALLNLCLLFP AIVQ  
Pi\_16636 176 FGYAASGFELELFAIYQDVTGN--VKTHLIGGFNLQHAPERFRLVLALLNLCLLFP AIVQ  
CRN8 176 FGYAASGFELELFAIYQDVTGN--VKTHLIGGFNLQHAPERFRLVLALLNLCLLFP AIVQ  
Pi\_19565 176 FGYAASGFELELFAIYQDVTGN--VKTHLIGGFNLQHAPERFRLVLALLNLCLLFP AIVQ  
Pr\_84114 177 FGYAAVGLQVCLVAIRKDEMTERGAKVEI IETYDLGDLNGRLSFFLALLNLSTLFRPVVD  
Pr\_80840 177 FGYAAVGLQVCLVAIRKDEMTERGAKVEI IETYDLGDLNGRLSFFLALLNLSTLFRPVVD  
Pr\_75879 177 FGYAAVGLQVCLVAIRKDEMTERGAKVEI IETYDLGDLNGRLSFFLALLNLSTLFRPVVD

Pi\_19589 234 NCPASAGTEFMDIHRANGVKVRLSPIFVDKIFHT---QEEYRRVKRIYDSLKAYRIPCA  
Pi\_12090 234 NCPASAGTEFMDIHRANGVKVRLSPIFVDKIFHT---QEEYRRVKRIYDSLKAYRIPCA  
Pi\_23274 234 NCPASAGTEFMDIHRANGVKVRLSPIFVDKIFHT---QEEYRRVKRIYDSLKAYRIPCA  
Pi\_12094 234 NCPASAGTEFMDIHRANGVKVRLSPIFVDKIFHT---QEEYRRVKRIYDSLKAYRIPCA  
Pi\_16585 234 NCPASAGTEFMDIHRANGVKVRLSPIFVDKIFHT---QEEYRRVKQIYDSLKAYGVPCA  
Pi\_16618 234 NCPASAGTEFMDIHRANGVKVRLSPIFVDKIFHT---QEEYRRVKQIYDSLKAYGVPCA  
Pi\_19318 234 NCPASAGTEFMDIHRANGVKVRLSPIFVDKIFHT---QEEYRRVKQIYDSLKAYGVPCA  
Pi\_12646 234 NCPASAGTEFMDIHRANGVKVRLSPIFVDKIFHT---QEEYRRVKQIYDSLKAYGVPCA  
Pi\_16636 234 NCPASAGTEFMDIHRANGVKVRLSPIFVDKIFHT---QEEYRRVKQIYDSLKAYGVPCA  
CRN8 234 NCPASAGTEFMDIHRANGVKVRLSPIFVDKIFHT---QEEYRRVKQIYDSLKAYGVPCA  
Pi\_19565 234 NCPASAGTEFMDIHRANGVKVRLSPIFVDKIFHT---QEEYRRVKQIYDSLKAYGVPCA  
Pr\_84114 237 LIQPLDILEYGTIERDNGVQITFAEDCVVKTYPQNMPSSDIIRNLRELHRQMKKHSVPNV  
Pr\_80840 237 LIQPLDILEYGTIERDNGVQITFAEDCVVKTYPQNMPSSDIIRNLRELHRQMKKHSVPNV  
Pr\_75879 237 LIQPLDILEYGTIERDNGVQITFAEDCVVKTYPQNMPSSDIIRNLRELHRQMKKHSVPNV

\*\*

Pi\_19589 290 DAVVTVDSDQLRLTLKPRGIVEMKPCSLSELFVALGNVLEALVVLHRNGWMHRDIRWSNVI  
Pi\_12090 290 DAVVTVDSDQLRLTLKPRGIVEMKPCSLSELFVALGNVLEALVVLHRNGWMHRDIRWSNVI  
Pi\_23274 290 DAVVTVDSDQLRLTLKPRGIVEMKPCSLSELFVALGNVLEALVVLHRNGWMHRDIRWSNVI  
Pi\_12094 290 DAVVTVDSDQLRLTLKPRGIVEMKPCSLSELFVALGNVLEALVVLHRNGWMHRDIRWSNVI  
Pi\_16585 290 DAVVTVDSDQLRLTLKPRGIEMKPCSLSELFVALGNVLEALVVLHRNGWMHRDIRWSNVI  
Pi\_16618 290 DAVVTVDSDQLRLTLKPRGIEMKPCSLSELFVALGNVLEALVVLHRNGWMHRDIRWSNVI  
Pi\_19318 290 DAVVTVDSDQLRLTLKPRGIEMKPCSLSELFVALGNVLEALVVLHRNGWMHRDIRWSNVI  
Pi\_12646 290 DAVVTVDSDQLRLTLKPRGIEMKPCSLSELFVALGNVLEALVVLHRNGWMHRDIRWSNVI  
Pi\_16636 290 DAVVTVDSDQLRLTLKPRGIEMKPCSLSELFVALGNVLEALVVLHRNGWMHRDIRWSNVI  
CRN8 290 DAVVTVDSDQLRLTLKPRGIEMKPCSLSELFVALGNVLEALVVLHRNGWMHRDIRWSNVI  
Pi\_19565 290 DAVVTVDSDQLRLTLKPRGIEMKPCSLSELFVALGNVLEALVVLHRNGWMHRDIRWSNVI  
Pr\_84114 297 VDKKTNMTKKYVKLAPVGRSLPPVNAHQLLTALRDLIQALVALHAINLMHRDLRWENVL  
Pr\_80840 297 VDKKTNMTKKYVKLAPVGRSLRPENAHQLLTALRDLIQALVALHAINLMHRDLRWENVL  
Pr\_75879 297 VDKKTNMTKKYVKLAPVGRSLRPENAHQLLTALRDLIQALVALHAINLMHRDLRWENVL

Pi\_19589 350 KHIDR-VEWFLIDFADAAQSPQKYPSGDHLTHDEHASDIFMEGGSSHTTAVDLWAVGYLVK  
Pi\_12090 350 KHIDR-VEWFLIDFADAAQSPQKYPSGDHLTHDEHASDIFMEGGSSHTTAVDLWAVGYLVK  
Pi\_23274 350 KHIDR-VEWFLIDFADAAQSPQKYPSGDHLTHDEHASDIFMEGGSSHTTAVDLWAVGYLVK  
Pi\_12094 350 KHIDR-VEWFLIDFADAAQSPQKYPSGDHLTHDEHASDIFMEGGSSHTTAVDLWAVGYLVK  
Pi\_16585 350 KHIDR-VEWFLIDFADAAQSPQKYPSGDHLTHDEHASDIFMEGGSSHTTAVDLWAVGYLVK  
Pi\_16618 350 KHIDR-VEWFLIDFADAAQSPQKYPSGDHLTHDEHASDIFMEGGSSHTTAVDLWAVGYLVK  
Pi\_19318 350 KHIDR-VEWFLIDFADAAQSPQKYPSGDHLTHDEHASDIFMEGGSSHTTAVDLWAVGYLVK  
Pi\_12646 350 KHIDR-VEWFLIDFADAAQSPQKYPSGDHLTHDEHASDIFMEGGSSHTTAVDLWAVGYLVK  
Pi\_16636 350 KHIDR-VEWFLIDFADAAQSPQKYPSGDHLTHDEHASDIFMEGGSSHTTAVDLWAVGYLVK  
CRN8 350 KHIDR-VEWFLIDFADAAQSPQKYPSGDHLTHDEHASDIFMEGGSSHTTAVDLWAVGYLVK  
Pi\_19565 350 KHIDR-VEWFLIDFADAAQSPQKYAQRSSLDARRTRFRYNYGRWIPHDG-----  
Pr\_84114 357 KYPGEGDKWFLIDFDEGASSP--AAKVKHLKAESHAPETSSSS--HTVKVDIWSVGFLLM  
Pr\_80840 357 KYPGEGDKWFLIDFDEGASSP--AAKVKHLKAESHAPETSSSS--HTVKVDIWSVGFLLM  
Pr\_75879 357 KYPGEGDKWFLIDFDEGASSP--AAKVKHLKAESHAPETSSSS--HTVKVDIWSVGFLLM

NLS

Pi\_19589 409 TSKIEREWTAEPERALSWIG-----  
Pi\_12090 409 TSKIEREWTAEPERALFLDRLMNTDPSARPTADEALQLLSRFEREAAEQDHRARVCAARKK  
Pi\_23274 409 TSKIEREWTAEPERALFLDRLMNTDPSARPTADEALQLLSRFEREAAEQESQGKGVKKK  
Pi\_12094 409 TSKIEREWTAEPERALFLDRLMNTDPSARPTADEALQLLSRFEREAAEQESQGKGVKKK  
Pi\_16585 409 TSKIEREWTAEPERALS-----  
Pi\_16618 409 TSKIEREWTAEPERALFLDRLMNTDPSARPTADEALQLLSRFEREAAEQESQGKGVKKK  
Pi\_19318 409 TSKIEREWTAEPERALFLDRLMNTDPSARPTADEALQLLSRFEREAAEQESQGKGVKKK  
Pi\_12646 409 TSKIEREWTAEPERALFLDRLMNTDPSARPTADEALQLLSRFEREAAEQESQGKGVKKK  
Pi\_16636 409 TSKIEREWTAEPERALFLDRLMNTDPSARPTADEALQLLSRFEREAAEQESQGKGVKKK  
CRN8 409 TSKIEREWTAEPERALFLDRLMNTDPSARPTADEALQLLSRFEREAAEQESQGKGVKKK  
Pi\_19565 409 TSKIEREWTAEPERALS-----  
Pr\_84114 413 TSPYQ---DLPPELESVKAQCLQKNPSSRPTAESLLKVVESLIES-----  
Pr\_80840 414 TSPCQ---DLPPELESVKAQCLQKSPSSRPTAESLLKVVESLIES-----  
Pr\_75879 413 TSPCH---DLPPELESVKAQCLQKNPSSRPTAESLLKVVESLIES-----

```
Pi_19589 -----  
Pi_12090 469 DVREFLHRYGTTITRWDEVLWY  
Pi_23274 469 RRA-----  
Pi_12094 469 RRA-----  
Pi_16585 -----  
Pi_16618 469 RRA-----  
Pi_19318 469 RRV-----  
Pi_12646 469 RRA-----  
Pi_16636 469 RCA-----  
CRN8      469 RRA-----  
Pi_19565 -----  
Pr_84114 -----  
Pr_80840 -----  
Pr_75879 -----
```
