# Supplementary material for: The Irish Potato Famine Pathogen Phytophthora infestans Translocates the CRN8 Kinase into Host Plant Cells
Source: PLoS Pathog. 2012 Aug 23;8(8):e1002875. doi: 10.1371/journal.ppat.1002875 (PMC3426532; doi:10.1371/journal.ppat.1002875)
Supplement: Table S2 — Primers used for the presented CRN8 study. (PDF) [file ppat.1002875.s006.pdf]

**Supplemental Table 2. Primers for generated constructs and mutations**

| <b>PVX cloning (pGR106 ClaI-NotI)</b> |                                                     |
|---------------------------------------|-----------------------------------------------------|
| CRN8_F1                               | GCGATCGATGGTTACTTTGTTCTGTGCCGTCGTTGGTGTG            |
| CRN8_F118                             | GCGCCATGGAATCGATGGGACAAGTAGTGCGCCTATTTCTG           |
| CRN8_F146                             | GCGCCATGGAATCGATGCTGCCGACACGCGGAGATCTAAATGAATTTATC  |
| CRN8_F176                             | GCGCCATGGAATCGATGTTGATACTAGGCCAACTCCTTCGAGATAAATTG  |
| CRN8_F220                             | GCGCCATGGAATCGATGAGTGCATTTTATTATTTCTGGGATTCAATTATC  |
| CRN8_F282                             | GCGCCATGGAATCGATGATCACTGTGCCTCGTGAGGAGCTCTCTAAAAAG  |
| CRN8_R514                             | GCGGCGGCCGCTCACGTGTGGGATCCACCTTCCATAAAAATATC        |
| CRN8_R551                             | GCGGCGGCCGCTCACGCTCTTTTCGGGCTCCGCAGTCCATTG          |
| CRN8_582                              | GCGGCGGCCGCTCAAGCTTCACGTTCAAACGTCAGACAGAAGCTGTAAGGC |
| CRN8_R                                | GCGCTGCAGCGGCCGCTCAGGCACGTCTGTGCTTCTTGCGCAC         |

| <b>pENTR</b>     |                                  |
|------------------|----------------------------------|
| CRN8_pENTR_F_MvD | caccATGGGGACAAGTAGTGCGCCTATTTCTG |
| CRN8_pENTR_R_MvD | TCAGGCACGTCTGTGCTTCTTGCGCACACCC  |

| <b>pTRBO cloning (pJL48 PacI-NotI)</b> |                                       |
|----------------------------------------|---------------------------------------|
| CRN8_118_F_pJL48_MvD                   | CGATGATGATTTCGGAGGCTACTGTGCGCCG       |
| CRN8_599_R_pJL48_MvD                   | GATTACGGACACAATCCGTTATTTATTATGCATCTTG |

| <b>RD to AA mutation</b> |                                           |
|--------------------------|-------------------------------------------|
| CRN8_F_AAtoRD_MvD        | AACGGGTGGATGCACGCAGCCATCCGTTGGTCTAACGTGAT |
| CRN8_R_AAtoRD_MvD        | TTAGACCAACGGATGGCTGCGTGATCCACCCGTTGCGA    |

| <b>D to N mutation</b> |                                |
|------------------------|--------------------------------|
| F_CRN8_D470N_MvD       | CGGGTGGATGCACAGAAACATCCGTTGGTC |
| R_CRN8_D470N_MvD       | GACCAACGGATGTTTCTGTGCATCCACCCG |

| <b>S to A mutations</b> |                                |
|-------------------------|--------------------------------|
| F_CRN8_S249A_MvD        | CGTCAACCGGGATTTCGGCCAGGAAATCC  |
| R_CRN8_S249A_MvD        | GGATTTCTTGCCGAATCCCGGTTGACG    |
| F_CRN8_S281A_MvD        | GAACCTCGTACTGCTATCACTGTGCCTCG  |
| R_CRN8_S281A_MvD        | CGAGGCACAGTGATAGCAGTACGAGGTTG  |
| F_CRN8_S385A_MvD        | GTCAAGGTGCGGTTGGCTCCGATTTTCG   |
| R_CRN8_S385A_MvD        | CGAAAATCGGAGCCAACCGCACCTTGAC   |
| F_CRN8_S474A_MvD        | CATCCGTTGGGCTAACGTGATCAAGC     |
| R_CRN8_S474A_MvD        | GCTTGATCACGTTAGCCCAACGGATG     |
| F_CRN8_S587A_MvD        | CGTGAAGCTGCTGAGCAGGAAGCACAGGGC |
| R_CRN8_S587A_MvD        | GCCCTGTGCTTCTGCTCAGCAGCTTCACG  |
